# Supplementary material
Source: PubMed Central journal article supplement (PMC8544028)
Supplement: NIHMS960679-supplement-Supplemental_Figure_Legends.pdf [file NIHMS960679-supplement-Supplemental_Figure_Legends.pdf]

## **Figure legends**

Supplemental Figure e1 (A and B). Endorsement of any headache trigger as a function of triggers queried and publication year (meta-regressions)

Supplemental Figure e2. Trigger endorsement as a function of headache diagnosis (migraine as reference)

Supplemental Figure e3. Endorsement rates of 4 trigger categories

Supplemental Figure e4. Endorsement rates of 30 trigger categories
