# Supplementary material
Source: PubMed Central journal article supplement (PMC8544028)
Supplement: NIHMS960679-supplement-Supplemental_References.pdf [file NIHMS960679-supplement-Supplemental_References.pdf]

## Studies in Meta-Analysis (Supplemental References)

1. Alstadhaug KB, Salvesen R, and Bekkelund SI. Seasonal variation in migraine. *Cephalalgia* 2005;25:811-816.
2. Andress-Rothrock D, King W, and Rothrock J. An analysis of migraine triggers in a clinic-based population. *Headache* 2010;50:1366-1370.
3. Baldacci F, Vedovello M, Ulivi M, et al. Triggers in allodynic and non-allodynic migraineurs. A clinic setting study. *Headache* 2013;53:152-160.
4. Bánk J and Márton S. Hungarian migraine epidemiology. *Headache* 2000;40:164-169.
5. Barloese M, Lund N, Petersen A, et al. Sleep and chronobiology in cluster headache. *Cephalalgia* 2015;35:969-978.
6. Blau JN and Engel HO. A new cluster headache precipitant: Increased body heat. *Lancet* 1999;354:1001-1002.
7. Blau JN. Water deprivation: A new migraine precipitant. *Headache* 2005;45:757-759.
8. Blau JN, Kell CA, and Sperling JM. Water-deprivation headache: A new headache with two variants. *Headache* 2004;44:79-83.
9. Carod-Artal F, Ezpeleta D, Martín-Barriga ML, et al. Triggers, symptoms, and treatment in two populations of migraineurs in Brazil and Spain. A cross-cultural study. *J Neurol Sci* 2011;304:25-28.
10. Chabriat HM, Danchot J, Michel P, et al. Precipitating factors of headache. A prospective study in a national control-matched survey in migraineurs and nonmigraineurs. *Headache* 1999;39:335-338.
11. Chakravarty A, Mukherjee A, and Roy D. Trigger factors in childhood migraine: A clinic-based study from eastern India. *J Headache Pain* 2009;10:375-380.
12. Chen SP, Fuh JL, Lirng JF, Chang FC, Wang SJ. Recurrent primary thunderclap headache and benign CNS angiopathy: Spectra of the same disorder? *Neurology* 2006;67:2164-2169.
13. Cologno D, Torelli P, Manzoni C. Possible predictive factors in the prognosis of migraine with aura. *Cephalalgia* 1999;19:824-830.
14. Connelly M, Miller T, Gerry G, et al. Electronic momentary assessment of weather changes as a trigger of headaches in children. *Headache* 2010;50:779-789.
15. Croquelois A, Assal G, Annoni J, et al. Diseases of the nervous system: Patient's aetiological beliefs. *J Neurol Neurosurg Psychiatry* 2005;76:582-584.
16. Deleu D and Hanssens Y. Primary chronic daily headache: Clinical and pharmacological aspects. A clinic-based study in Oman. *Headache* 1999;39:432-436.
17. Drummond PD. Predisposing, precipitating, and relieving factors. *Headache* 1985;25:16-22.
18. Fishbain DA, Cutler R, Cole B, et al. International Headache Society headache diagnostic patterns in pain facility patients. *Clin J Pain* 2001;17:78-93.
19. Fraga MDB, Pinho RS, Andreoni S, et al. Trigger factors mainly from the environmental type are reported by adolescents with migraine. *Arq Neuropsiquiatr* 2013;71:290-293.
20. Fragoso YD, Carvalho R, Ferrero F, et al. Crying as a precipitating factor for migraine and tension-type headache. *São Paulo Med J* 2003;121:31-33.
21. Fukui PT, Goncalves TRT, Strabelli CG, et al. Trigger factors in migraine patients. *Arq Neuropsiquiatr* 2008;66:494-499.
22. Galinović I, Vuković V, Trošelj M, et al. Migraine and tension-type headache in medical students: A questionnaire study. *Coll Antropol* 2009;33:169-173.

23. Haimanot R, Seraw B, Forsgren L, et al. Migraine, chronic tension-type headache, and cluster headache in an Ethiopian rural community. *Cephalalgia* 1995;15:482-488.
24. Hansen JM, Hauge AW, Ashina M, et al. Trigger factors for familial hemiplegic migraine. *Cephalalgia* 2011;31:1274-1281.
25. Hauge AW, Kirchmann M, and Olesen J. Trigger factors in migraine with aura. *Cephalalgia* 2010;30:346-353.
26. Hay KM, Mortimer MJ, Barker DC, et al. 1044 women with migraine: the effect of environmental stimuli. *Headache* 1994;34:166-168.
27. Hung CI, Liu CY, and Wang SJ. Precipitating or aggravating factors for headache in patients with major depressive disorder. *J Psychosom Res* 2008;64:231-235.
28. Ierusalimsky R. Precipitating factors of migraine attacks in patients with migraine without aura. *Arq Neuropsiquiatr* 2001;59:983-983.
29. Karli N, Zarifoglu M, Calisir N, et al. Comparison of pre-headache phases and trigger factors of migraine and episodic tension-type headache: Do they share similar clinical pathophysiology? *Cephalalgia* 2005;25:444-451.
30. Karli N, Akgöz S, Zarifoğlu M, et al. Clinical characteristics of tension-type headache and migraine in adolescents: A student-based study. *Headache* 2006;46:399-412.
31. Kelman L. The triggers or precipitants of the acute migraine attack. *Cephalalgia* 2007;27:394-402.
32. Kelman L. Migraine changes with age: IMPACT on migraine classification. *Headache* 2006;46:1161-1171.
33. Kelman L. Osmophobia and taste abnormality in migraineurs: A tertiary care study. *Headache* 2004;44:1019-1023.
34. Kelman L, Rains JC. Headache and sleep: Examination of sleep patterns and complaints in a large clinical sample of migraineurs. *Headache* 2005;45:904-910.
35. Koppen H and van Veldhoven PL. Migraineurs with exercise-triggered attacks have a distinct migraine. *J Headache Pain* 2013;14:99-2377-14-99.
36. Liang X, Ying G, Huang Q, et al. Characteristics of primary stabbing headache in a tertiary neurological clinic in china. *Pain Med* 2014;15:871-875.
37. Lilleng Hand Bekkelund S. Seasonal variation of migraine in an arctic population. *Headache* 2009;49:721-725.
38. Lipton R, Newman L, Cohen J, et al. Aspartame as a dietary trigger. *Headache* 1989;29:90-92.
39. López-Mesonero L, Márquez S, Parra P, et al. Smoking as a precipitating factor for migraine: A survey in medical students. *J Headache Pain* 2009;10:101-103.
40. MacGregor EA, Brandes J, Eikermann A, et al. Impact of migraine on patients and their families: The migraine and zolmitriptan evaluation (MAZE) survey--phase III. *Curr Med Res Opin* 2004;20:1143-1150.
41. Maratos J and Wilkinson M. Migraine in children: a medical and psychiatric study. *Cephalalgia* 1982;2:179-187.
42. Marcus DA. Gender differences in chronic headache in a treatment-seeking population. *J Gend Specif Med* 2000;3:50-53.
43. Marcus DA. Gender differences in treatment-seeking chronic headache sufferers. *Headache* 2001;41:698-703.
44. Martin PR and Teoh H. Effects of visual stimuli and a stressor on head pain. *Headache* 1999;39:705-715.

45. Matuja WB. Headache: pattern and features as experienced in a neurology clinic in Tanzania. *East Afr Med J* 1991;68:935-943.
46. Mehta S. Study of various social and demographic variables associated with primary headache disorders in 500 school-going children of central India. *J Pediatr Neurosci* 2015;10:13.
47. Menon B and Kinnera N. Prevalence and characteristics of migraine in medical students and its impact on their daily activities. *Ann Indian Acad Neurol* 2013;16:221.
48. Milde-Busch A, Straube A, Heinen F, et al. Identified risk factors and adolescents' beliefs about triggers for headaches: Results from a cross-sectional study. *J Headache Pain* 2012;13:639-643.
49. Mishra D and Sharma A. Triggers of migraine in children at a public hospital in India. *SpringerPlus* 2012;1:1-2.
50. Mollaoglu M. Trigger factors in migraine patients. *J Health Psychol* 2013;18:984-994.
51. Mounstephen AM and Harrison RK. A study of migraine and its effects in a working population. *Occup Med* 1995;45:311-317.
52. Neut D, Fily A, Cuvellier J, et al. The prevalence of triggers in paediatric migraine: A questionnaire study in 102 children and adolescents. *J Headache Pain* 2012;13:61-65.
53. Ofovwé GE and Ofili AN. Prevalence and impact of headache and migraine among secondary school students in Nigeria headache. *Headache* 2010;50:1570-1575.
54. Ong JC, Stepanski EJ, and Gramling SE. Pain coping strategies for tension-type headache: Possible implications for insomnia? *J Clin Sleep Med* 2009;5:52-56.
55. Osterhaus S and Passchier J. Perception of triggers in young nonclinical school students with migrainous headaches and with tension headaches. *Percept Mot Skills* 1992;75:284-286.
56. Panconesi A, Franchini M, Bartolozzi ML, et al. Alcoholic drinks as triggers in primary headaches. *Pain Med* 2013;14:1254-1259.
57. Passchier J and Orlebeke JF. Headaches and stress in schoolchildren: An epidemiological study. *Cephalalgia* 1985;5:167-176.
58. Peatfield RC. Relationships between food, wine, and beer-precipitated migrainous headaches. *Headache* 1995;35:355-357.
59. Phanthumchinda K and Sithi-Amorn C. Prevalence and clinical features of migraine: A community survey in Bangkok, Thailand. *Headache* 1989;29:594-597.
60. Rains J and Penzien D. Precipitants of episodic migraine: Behavioral, environmental, hormonal, and dietary factors. *Headache* 1996;36:274-275.
61. Rasmussen BK. Migraine and tension-type headache in a general population: Precipitating factors, female hormones, sleep pattern and relation to lifestyle. *Pain* 1993;53:65-72.
62. Ravishankar K. 'Hair wash' or 'head bath' triggering migraine – observations in 94 Indian patients. *Cephalalgia* 2006;26:1330-1334.
63. Robbins L. Precipitating factors in migraine: A retrospective review of 494 patients. *Headache* 1994;34:214-216.
64. Rozen TD and Fishman RS. Female cluster headache in the United States of America: What are the gender differences?: Results from the united states cluster headache survey. *J Neurol Sci* 2012;317:17-28.
65. Russell MB, Rasmussen BK, Fenger K, et al. Migraine without aura and migraine with aura are distinct clinical entities: A study of four hundred and eighty-four male and female migraineurs from the general population. *Cephalalgia* 1996;16:239-245.
66. Savi L, Rainero I, Valfre W, et al. Food and headache attacks: A comparison of patients with migraine and tension-type headache. *Panminerva Med* 2002;44:27-31.

67. Scharff L, Turk DC, and Marcus DA. Triggers of headache episodes and coping responses of headache diagnostic groups. *Headache* 1995;35:397-403.
68. Shah PA and Nafee A. Clinical profile of headache and cranial neuralgias. *J Assoc Physicians India* 1999;47:1072-1075.
69. Silva-Neto RP, Peres MF, and Valenca MM. Odorant substances that trigger headaches in migraine patients. *Cephalalgia* 2014;34:14-21.
70. Sjöstrand C, Savic I, Laudon-Meyer E, et al. Migraine and olfactory stimuli. *Curr Pain Headache Rep* 2010;14:244-251.
71. Spierings ELH, Ranke AH, and Honkoop PC. Precipitating and aggravating factors of migraine versus tension-type headache. *Headache* 2001;41:554-558.
72. Theeler BJ, Kenney K, Prokhorenko OA, et al. Headache triggers in the US military. *Headache* 2010;50:790-794.
73. Thilothammal N, Chellaraj M, Banu K, et al. Migraine in children. *Indian Pediatr* 1994;31:1503-1510.
74. Tonini M and Frediani F. Headache at high school: Clinical characteristics and impact. *Neurol Sci* 2012;33:185-187.
75. Turner LC, Molgaard CA, Gardner CH, et al. Migraine trigger factors in non-clinical Mexican-American population in San Diego county: Implications for etiology. *Cephalalgia* 1995;15:523-530.
76. Ulrich V, Olesen J, Gervil M, et al. Possible risk factors and precipitants for migraine with aura in discordant twin-pairs: A population-based study. *Cephalalgia* 2000;20:821-825.
77. Van den Bergh V, Amery WK, and Waelkens J. Trigger factors in migraine: A study conducted by the belgian migraine society. *Headache* 1987;27:191-196.
78. Vijayan N, Gould S, and Watson C. Exposure to sun and precipitation of migraine. *Headache* 1980;20:42-43.
79. Visudtibhan A, Thampratankul L, Khongkhatithum C, et al. Migraine in junior high-school students: A prospective 3-academic-year cohort study. *Brain Dev* 2010;32:855-862.
80. Wang J, Huang Q, Li N, et al. Triggers of migraine and tension-type headache in China: A clinic-based survey. *Eur J Neurol* 2013;20:689-696.
81. Wöber C, Holzhammer J, Zeitlhofer J, et al. Trigger factors of migraine and tension-type headache: Experience and knowledge of the patients. *J Headache Pain* 2006;7:188-195.
82. Xie Q, Huang Q, Wang J, et al. Clinical features of cluster headache: An outpatient clinic study from China. *Pain Med* 2013;14:802-807.
83. Yadav RK, Kalita J, and Misra UK. A study of triggers of migraine in India. *Pain Med* 2010;11:44-47.
84. Ying G, Fan W, Li N, et al. Clinical characteristics of basilar-type migraine in the neurological clinic of a university hospital. *Pain Med* 2014;15:1230-1235.
85. Zivadinov R, Willheim K, Sepic-Grahovac D, et al. Migraine and tension-type headache in Croatia: A population-based survey of precipitating factors. *Cephalalgia* 2003;23:336-343.
