# Supplementary material
Source: PubMed Central journal article supplement (PMC8544028)
Supplement: NIHMS960679-supplement-Supplemental_Table_e1.pdf [file NIHMS960679-supplement-Supplemental_Table_e1.pdf]

Table e1. Summary data for analyzed studies.

| <b>Authors</b>          | <b>Year of Publication</b> | <b>Diagnostic Criteria</b> | <b>Total with Headache</b> | <b>% Female</b> | <b>Method of Assessment</b>             |
|-------------------------|----------------------------|----------------------------|----------------------------|-----------------|-----------------------------------------|
| Alstadhaug et al.       | 2005                       | IHS                        | 169                        | 100             | yes/no                                  |
| Andress-Rothrock et al. | 2010                       | IHS                        | 200                        | 89              | checklist and add-ins                   |
| Baldacci et al.         | 2013                       | IHS                        | 120                        | 86.7            | list with frequencies + self-generated  |
| Bánk & Márton           | 2000                       | IHS                        | 78                         | 71.8            | self-generated                          |
| Barloese et al.         | 2015                       | IHS                        | 275                        | 36.4            | not reported                            |
| Blau & Engel            | 1999                       | IHS                        | 200                        | 22.5            | yes/no                                  |
| Blau                    | 2005                       | IHS                        | 95                         | 62              | list                                    |
| Blau et al.             | 2004                       | not reported               | 34                         | 70.6            | asked questions about water deprivation |
| Carod-Artal et al.      | 2011                       | not reported               | 292                        | 80              | questionnaire                           |
| Chabriat et al.         | 1999                       | IHS                        | 535                        | not reported    | list + self-generated                   |
| Chakravarty et al.      | 2009                       | IHS                        | 200                        | 59              | checklist                               |
| Chen et al.             | 2006                       | IHS                        | 56                         | 91              | list with frequencies                   |
| Cologno et al.          | 1999                       | IHS                        | 77                         | 50              | list                                    |
| Connelly et al.         | 2010                       | IHS                        | 25                         | 84              | yes/no/I don't know                     |
| Croquelois et al.       | 2005                       | not reported               | 16                         | not reported    | list                                    |
| Deleu & Hanssens        | 1999                       | IHS                        | 77                         | 62.3            | list                                    |
| Drummond                | 1985                       | Drummond's                 | 600                        | 43.2            | yes/no                                  |
| Fishbain et al.         | 2001                       | IHS                        | 153                        | 64.2            | list                                    |
| Fraga et al.            | 2013                       | IHS                        | 50                         | not reported    | list                                    |
| Fragoso et al.          | 2003                       | IHS                        | 163                        | 70.3            | list                                    |
| Fukui et al.            | 2008                       | IHS                        | 198                        | 50              | not reported                            |
| Galinović et al.        | 2009                       | IHS                        | 220                        | 77.3            | list                                    |
| Haimanot et al.         | 1995                       | IHS                        | 454                        | 73.3            | yes/no                                  |
| Hansen et al.           | 2011                       | IHS                        | 75                         | 76              | list with frequencies                   |
| Hauge et al.            | 2010                       | IHS                        | 347                        | not reported    | list + 3 add-ins and Likert             |
| Hay et al.              | 1994                       | Ad hoc                     | 1044                       | 100             | list                                    |
| Hung et al.             | 2008                       | IHS                        | 122                        | 75.9            | list                                    |
| Ierusalimschy           | 2001                       | IHS                        | 100                        | 84              | list (interview)                        |
| Karli et al.            | 2005                       | IHS                        | 96                         | 89.2            | list                                    |
| Karli et al.            | 2006                       | IHS                        | 1001                       | 63.6            | list                                    |
| Kelman                  | 2007                       | IHS                        | 1207                       | 84.3            | list with frequencies                   |
| Kelman                  | 2004                       | IHS                        | 724                        | 85.4            | asked questions about perfume           |
| Kelman                  | 2006                       | IHS                        | 1009                       | 86.3            | list                                    |
| Kelman & Rains          | 2005                       | IHS                        | 1283                       | 84              | asked questions about sleep             |
| Koppen & van Veldhoven  | 2013                       | IHS                        | 103                        | 86              | not reported                            |

|                              |      |                                     |      |              |                                              |
|------------------------------|------|-------------------------------------|------|--------------|----------------------------------------------|
| Liang et al.                 | 2014 | IHS                                 | 18   | 61.1         | not reported                                 |
| Lilleng & Bekkelund          | 2009 | IHS                                 | 88   | 61.9         | seasonal variation yes/no                    |
| Lipton et al.                | 1989 | not reported                        | 171  | 77.1         | yes/no                                       |
| López-Mesonero et al.        | 2009 | IHS                                 | 17   | 88.2         | smoking yes/no                               |
| MacGregor et al.             | 2004 | IHS                                 | 709  | 100          | list                                         |
| Maratos & Wilkinson          | 1982 | Research Group on Headache          | 37   | not reported | not reported                                 |
| Marcus                       | 2003 | IHS                                 | 127  | 50           | list                                         |
| Marcus                       | 2001 | IHS                                 | 258  | 50           | list with frequencies                        |
| Martin & Teoh                | 1999 | IHS                                 | 75   | 76           | yes/no                                       |
| Matuja                       | 1991 | Adhoc                               | 139  | 46           | yes/no                                       |
| Mehta                        | 2015 | IHS                                 | 127  | 60.6         | yes/no                                       |
| Menon & Kinnera              | 2013 | IHS                                 | 144  | 62           | list                                         |
| Milde-Busch et al.           | 2012 | IHS                                 | 1047 | 100          | not reported                                 |
| Mishra & Sharma              | 2012 | IHS                                 | 26   | 53.5         | list + self-generated                        |
| Mollaoglu                    | 2013 | IHS                                 | 126  | 68.2         | yes/no                                       |
| Mounstephen & Harrison       | 1995 | IHS                                 | 62   | 41.9         | self-generated                               |
| Neut et al.                  | 2012 | IHS                                 | 102  | 46.1         | list with frequencies                        |
| Ofofwe & Ofili               | 2010 | IHS                                 | 328  | 64.8         | not reported                                 |
| Ong et al.                   | 2009 | IHS                                 | 32   | 100          | stress yes/no/unsure;<br>sleep yes/no/unsure |
| Osterhaus & Passchier        | 1992 | not reported                        | 41   | 58.8         | not reported                                 |
| Panconesi et al.             | 2013 | IHS                                 | 448  | 77.3         | yes/no                                       |
| Passchier & Orlebeke         | 1985 | not reported                        | 858  | 48.1         | not reported                                 |
| Peatfield                    | 1995 | IHS                                 | 462  | not reported | list                                         |
| Phanthumchinda & Sithi-Amorn | 1989 | Blau's                              | 157  | not reported | list                                         |
| Rains & Penzien              | 1996 | IHS                                 | 81   | 93           | list with range of frequencies               |
| Rasmussen                    | 1993 | IHS                                 | 286  | 50           | list with specifics about types              |
| Ravishankar                  | 2006 | IHS                                 | 94   | 100          | asked questions about hairwashing            |
| Robbins                      | 1994 | not reported                        | 494  | 50           | list                                         |
| Rozen & Fishman              | 2012 | Self-reported neurologist diagnosis | 1134 | 28           | not reported                                 |
| Russell et al.               | 1996 | IHS                                 | 333  | 50           | not reported                                 |
| Savi et al.                  | 2002 | IHS                                 | 179  | 62.6         | self-generated with cue of food              |
| Scharff et al.               | 1995 | IHS                                 | 174  | 85.2         | list + Likert                                |
| Shah & Nafee                 | 1999 | IHS                                 | 2516 | 41.2         | not reported                                 |
| Silva-Neto et al.            | 2014 | IHS                                 | 400  | 54.7         | list of odors with frequency                 |

|                     |      |              |      |              |                  |
|---------------------|------|--------------|------|--------------|------------------|
| Sjöstrand et al.    | 2010 | IHS          | 60   | 100          | multiple choice  |
| Spierings et al.    | 2001 | IHS          | 55   | 77.7         | list             |
| Theeler et al.      | 2010 | not reported | 172  | 30           | list + add-ons   |
| Thilothammal et al. | 1994 | Prensky's    | 50   | 46           | asked parents    |
| Tonini & Frediani   | 2012 | IHS          | 60   | 79           | not reported     |
| Turner et al.       | 1995 | IHS          | 132  | 50           | list + yes/no    |
| Ulrich et al.       | 2000 | IHS          | 169  | 59.2         | list             |
| Van den Berghet al. | 1987 | Ad hoc       | 217  | 81.1         | self-generated   |
| Vijayan et al.      | 1980 | Ad hoc       | 263  | 71.1         | yes/no           |
| Visudtibhan et al.  | 2010 | IHS          | 28   | 42.9         | checklist        |
| Wang et al.         | 2013 | IHS          | 738  | not reported | list             |
| Wöber et al.        | 2006 | IHS          | 120  | not reported | yes/no           |
| Xie et al.          | 2013 | IHS          | 26   | 23.1         | not reported     |
| Yadav et al.        | 2010 | IHS          | 182  | 72           | list (interview) |
| Ying et al.         | 2014 | IHS          | 23   | 82.6         | not reported     |
| Zivadinov et al.    | 2003 | IHS          | 2039 | not reported | list             |
