# Supplementary material
Source: PubMed Central journal article supplement (PMC8544028)

Figure e1 (e1A and e1B)

e1a

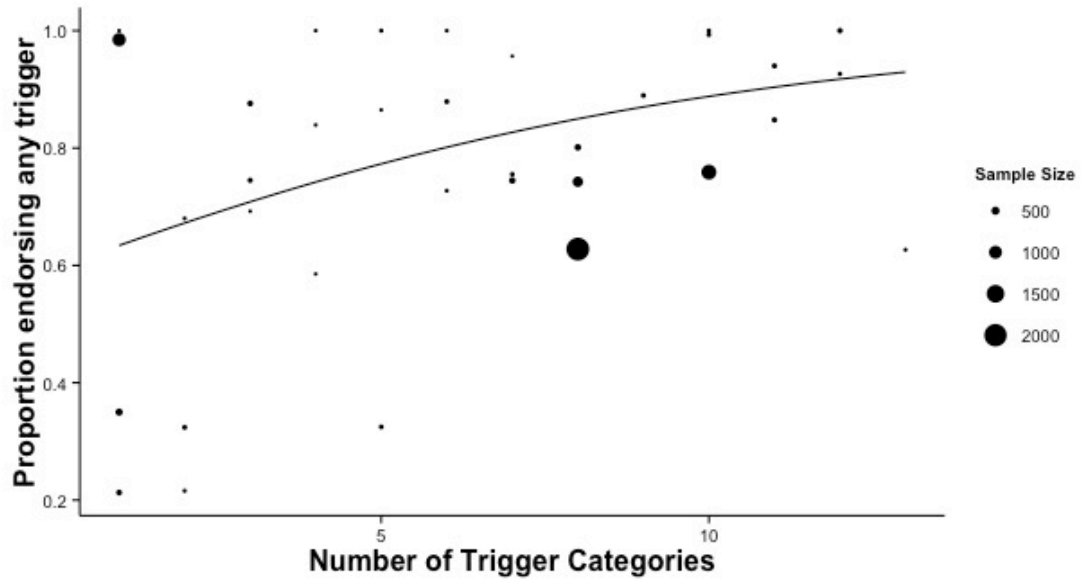

e1b

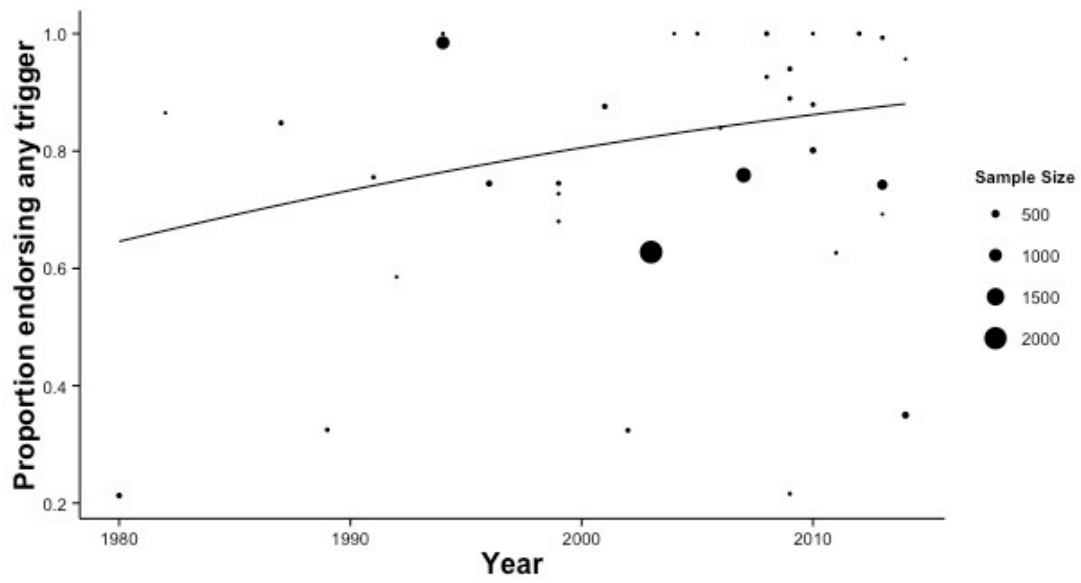

Supplement: NIHMS960679-supplement-Supplemental_Figure_e1.pdf [file NIHMS960679-supplement-Supplemental_Figure_e1.pdf]

Figure e3.

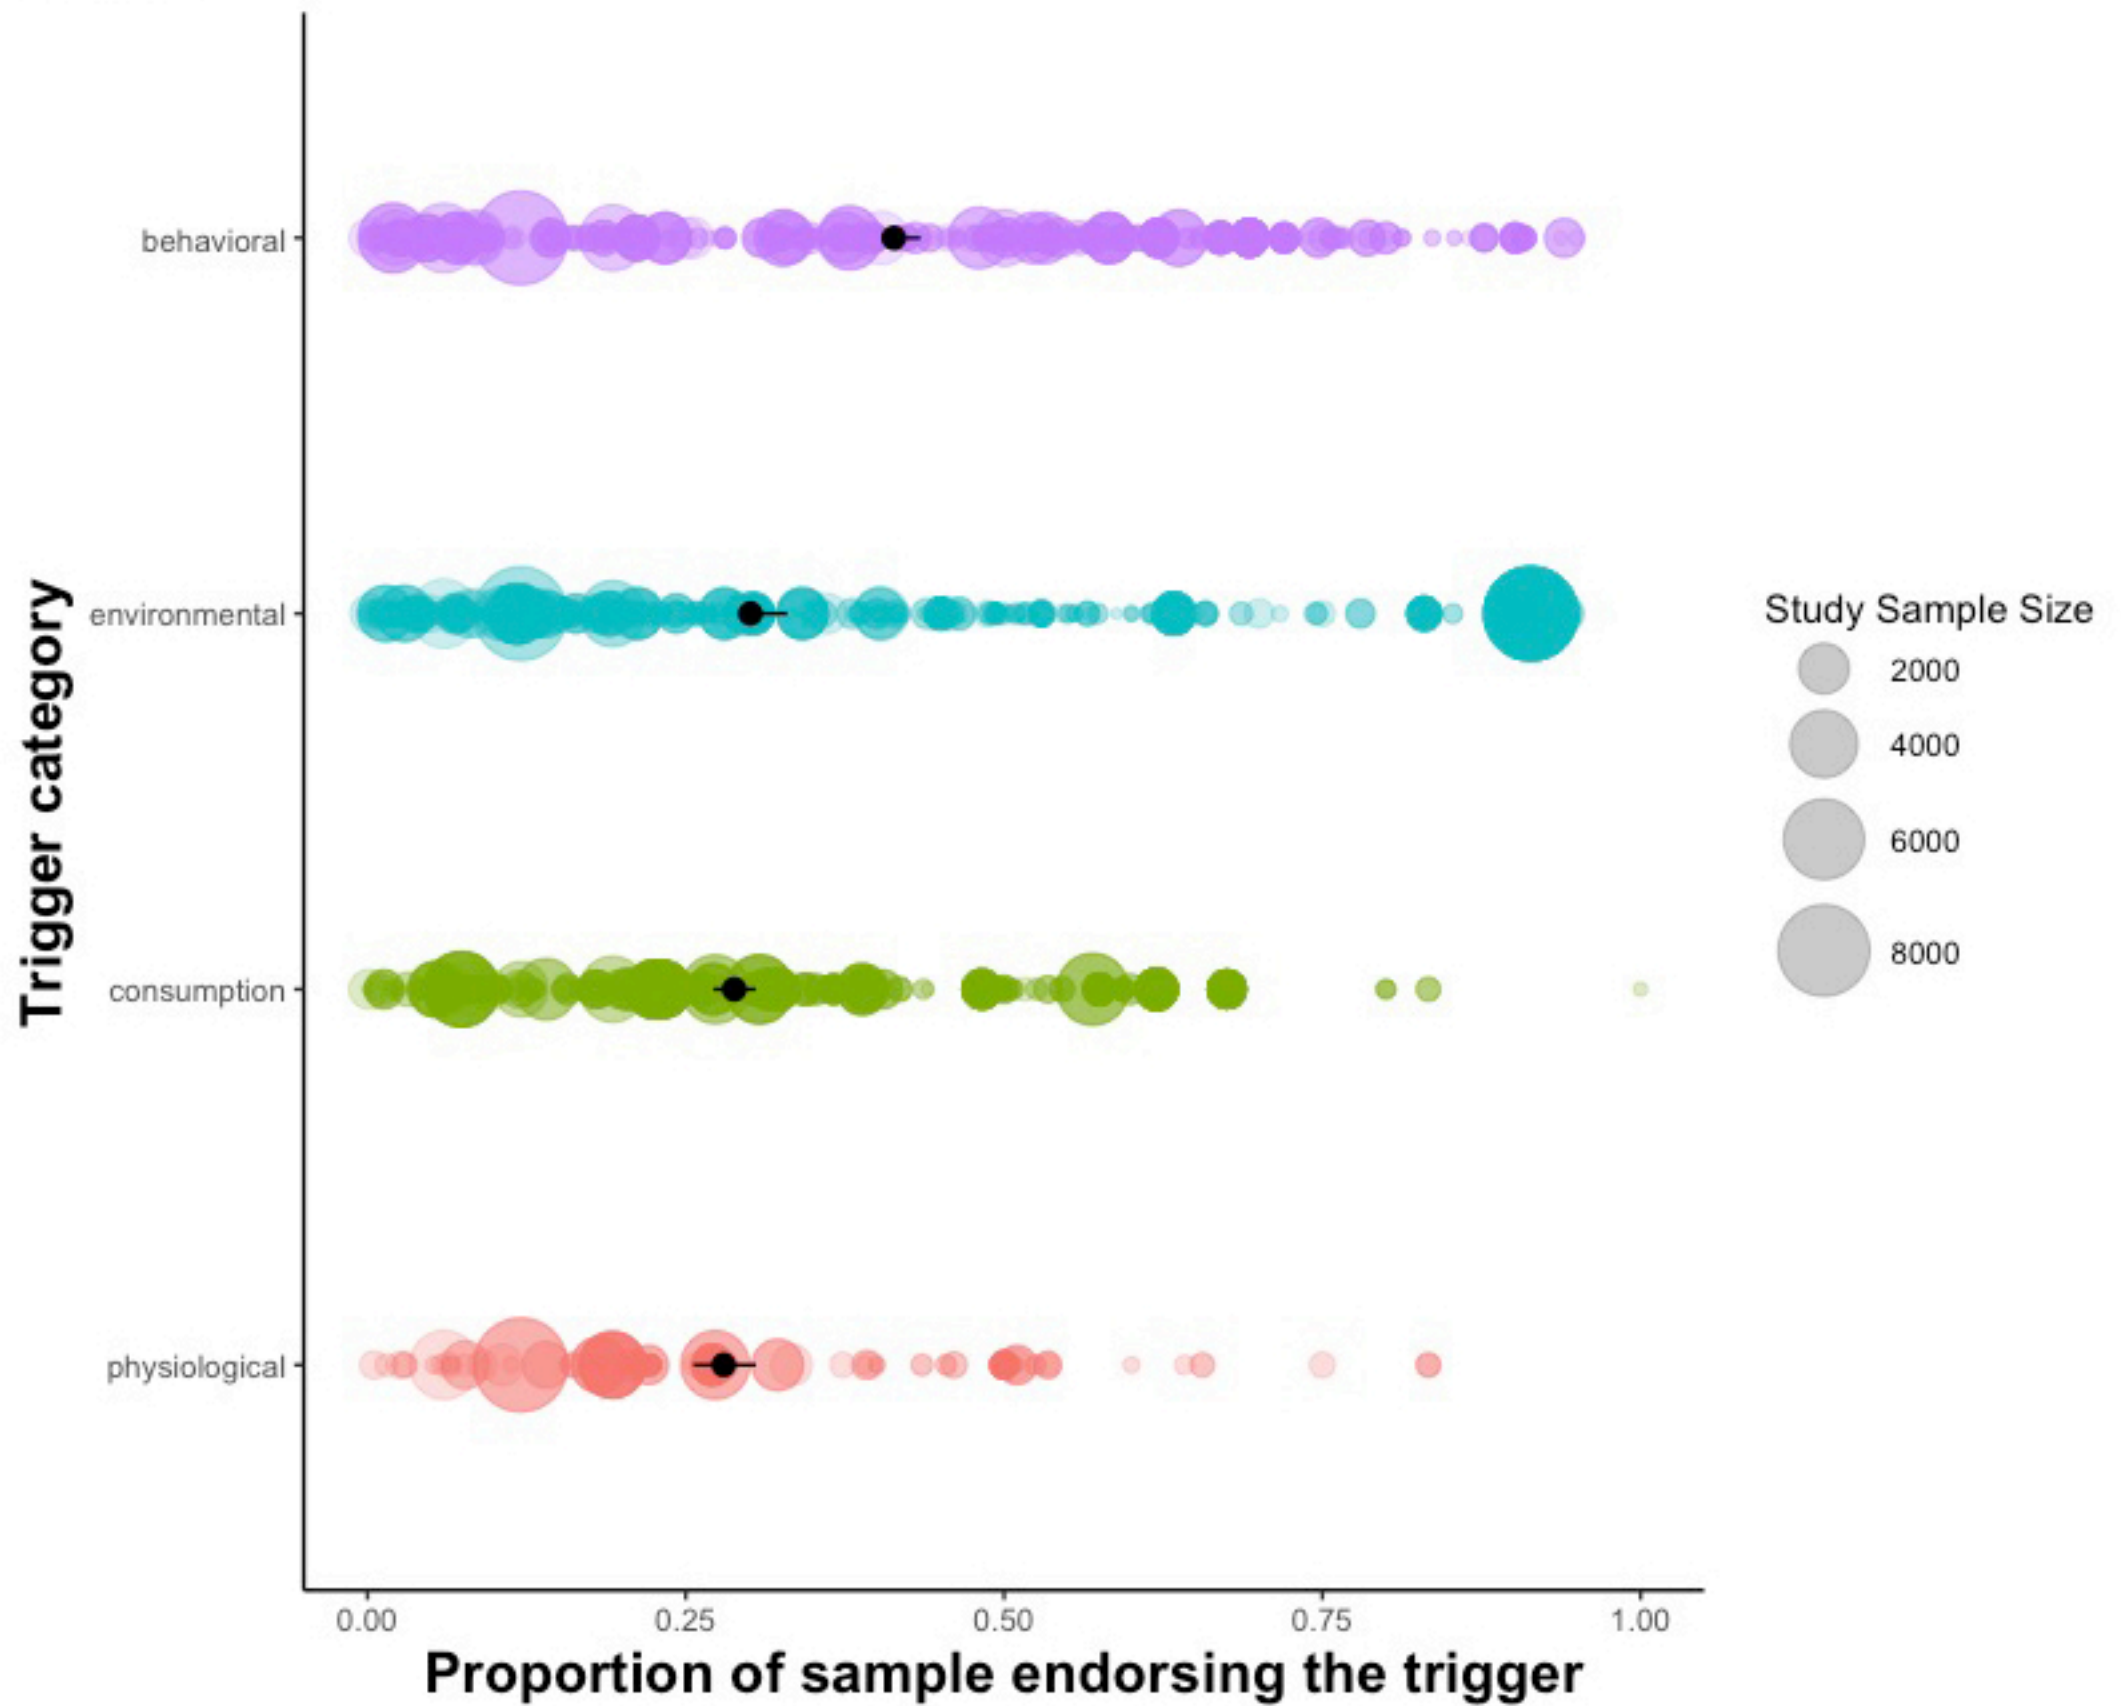

Supplement: NIHMS960679-supplement-Supplemental_Figure_e3.pdf [file NIHMS960679-supplement-Supplemental_Figure_e3.pdf]

Figure e4.

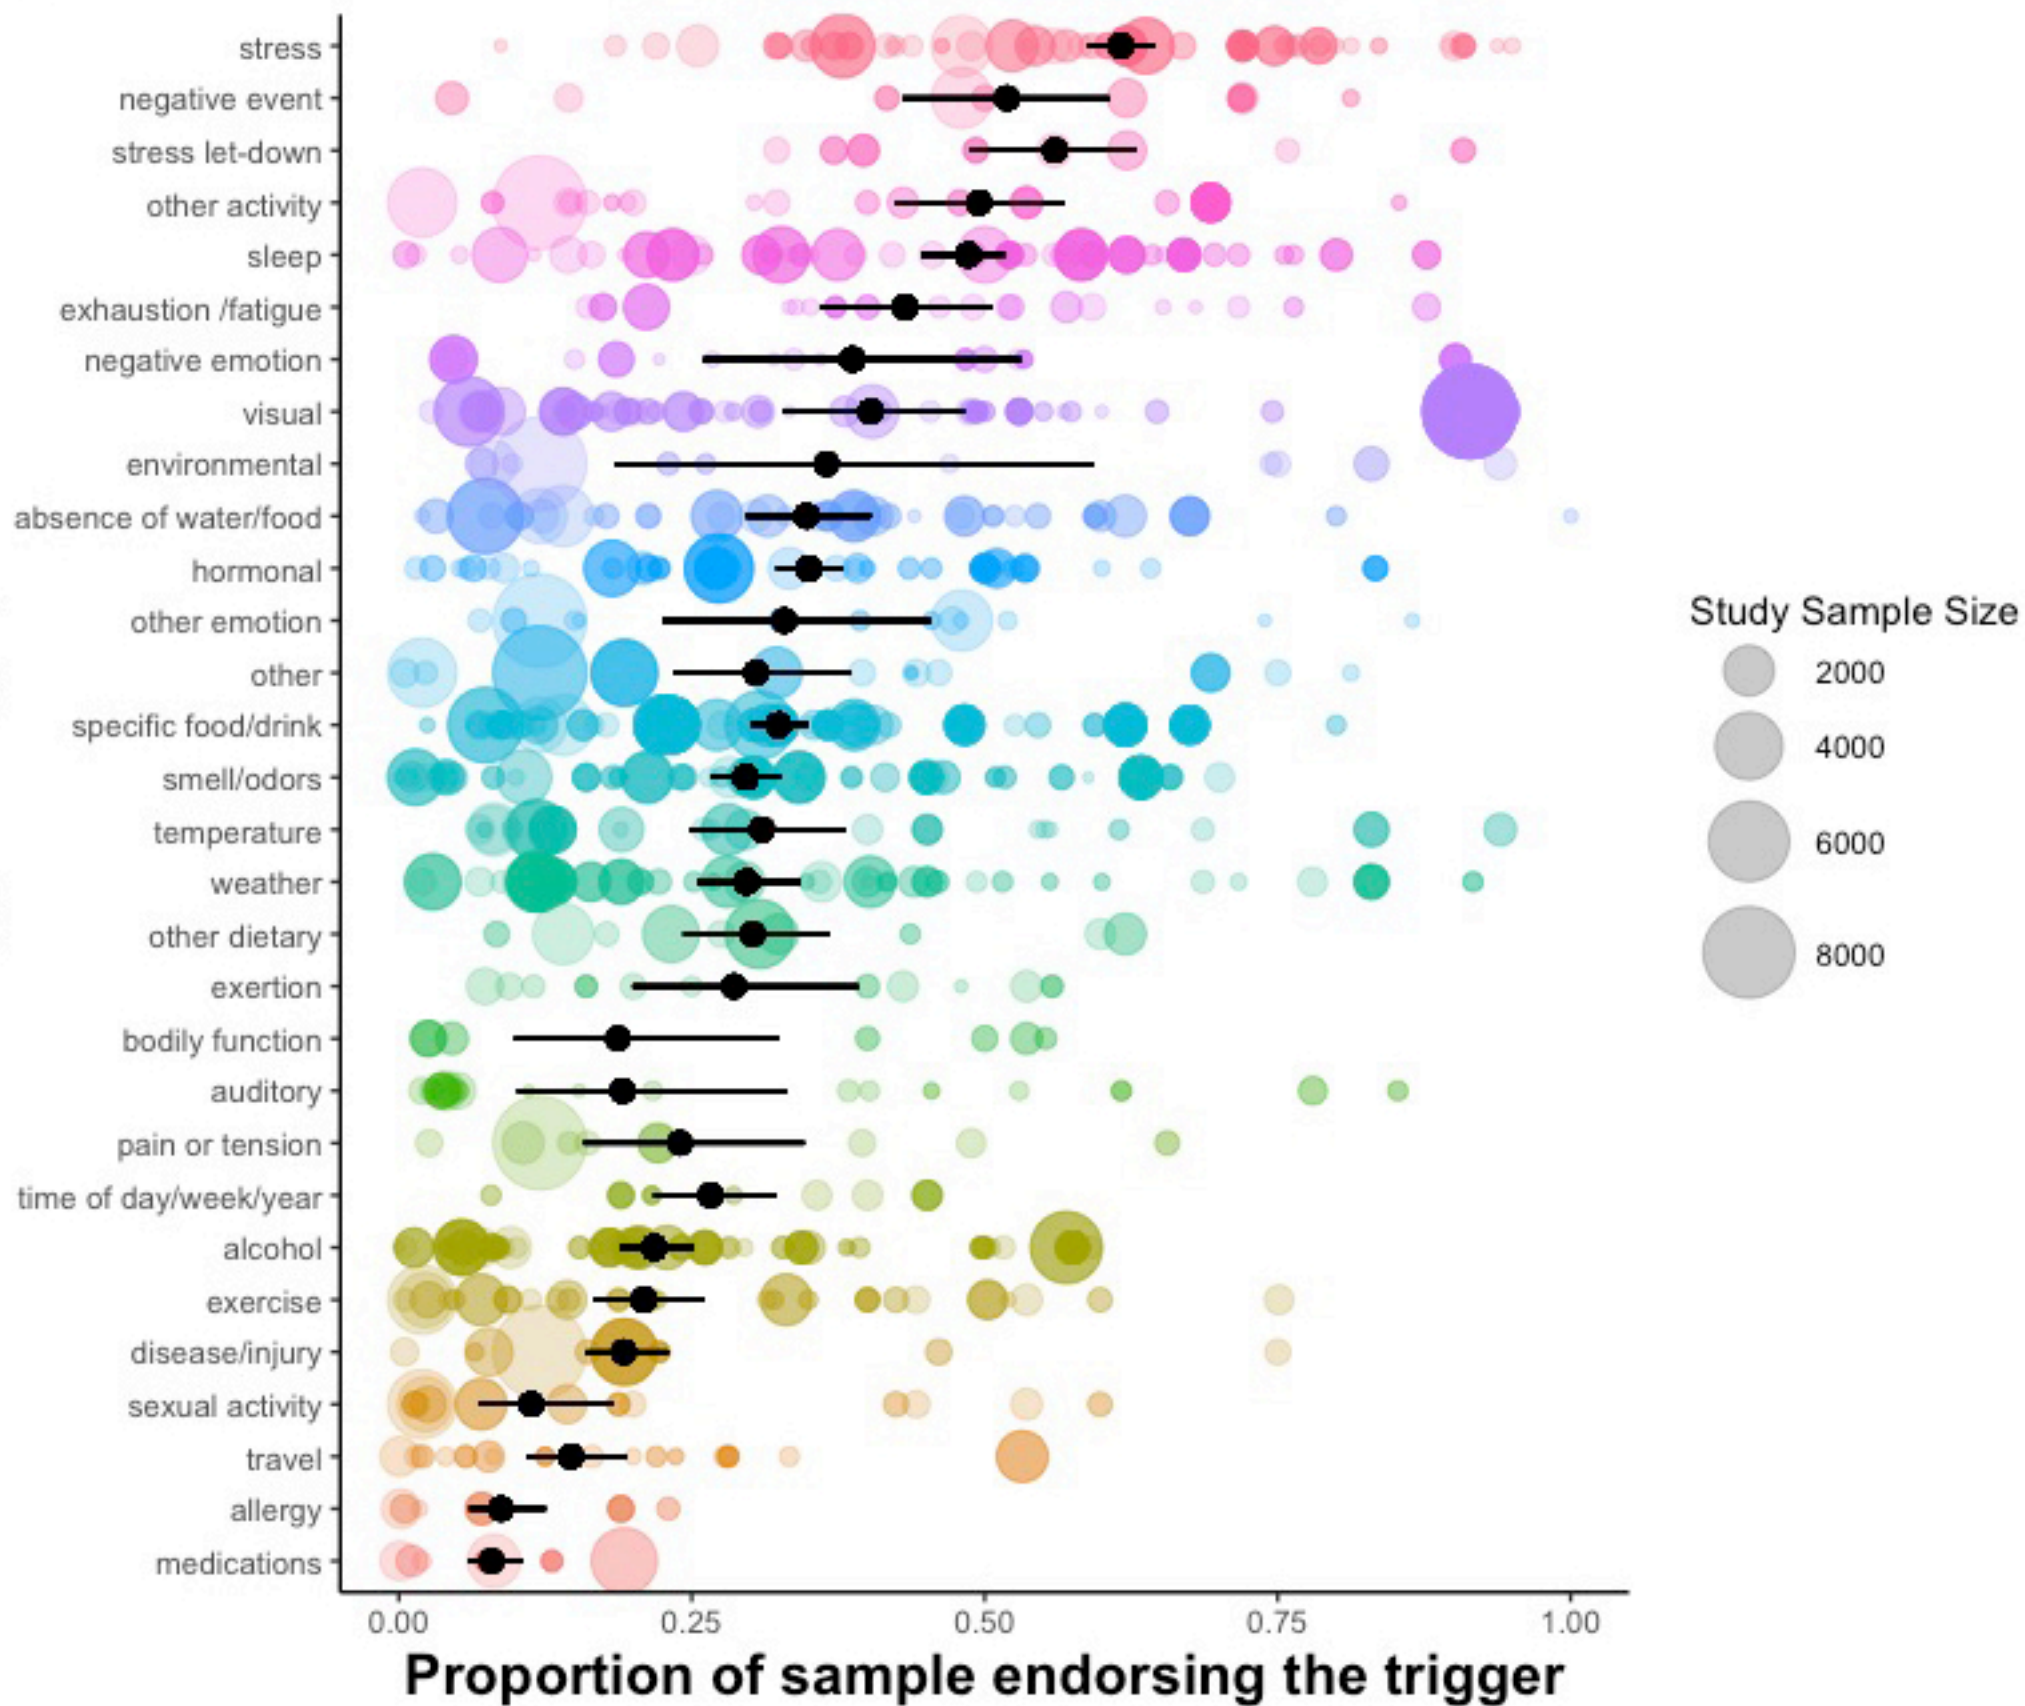

Supplement: NIHMS960679-supplement-Supplemental_Figure_e4.pdf [file NIHMS960679-supplement-Supplemental_Figure_e4.pdf]
